# Supplementary material for: OMI satellite observations of decadal changes in ground-level sulfur dioxide over North America
Source: Copernicus journal article supplement (doi:10.5194/acp-17-5921-2017), 2017-05-15
Supplement: Supplementary file 1 [file acp-17-5921-2017-supplement.pdf]

Supplement of Atmos. Chem. Phys., 17, 5921–5929, 2017  
<http://www.atmos-chem-phys.net/17/5921/2017/>  
doi:10.5194/acp-17-5921-2017-supplement  
© Author(s) 2017. CC Attribution 3.0 License.

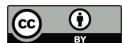

Atmospheric  
Chemistry  
and Physics  
Open Access  
EGU

*Supplement of*

## **OMI satellite observations of decadal changes in ground-level sulfur dioxide over North America**

**S. K. Kharol et al.**

*Correspondence to:* Shailesh K. Kharol ([shailesh.kharol@canada.ca](mailto:shailesh.kharol@canada.ca))

The copyright of individual parts of the supplement might differ from the CC-BY 3.0 licence.

## OMI SO<sub>2</sub> Surface Mixing Ratio

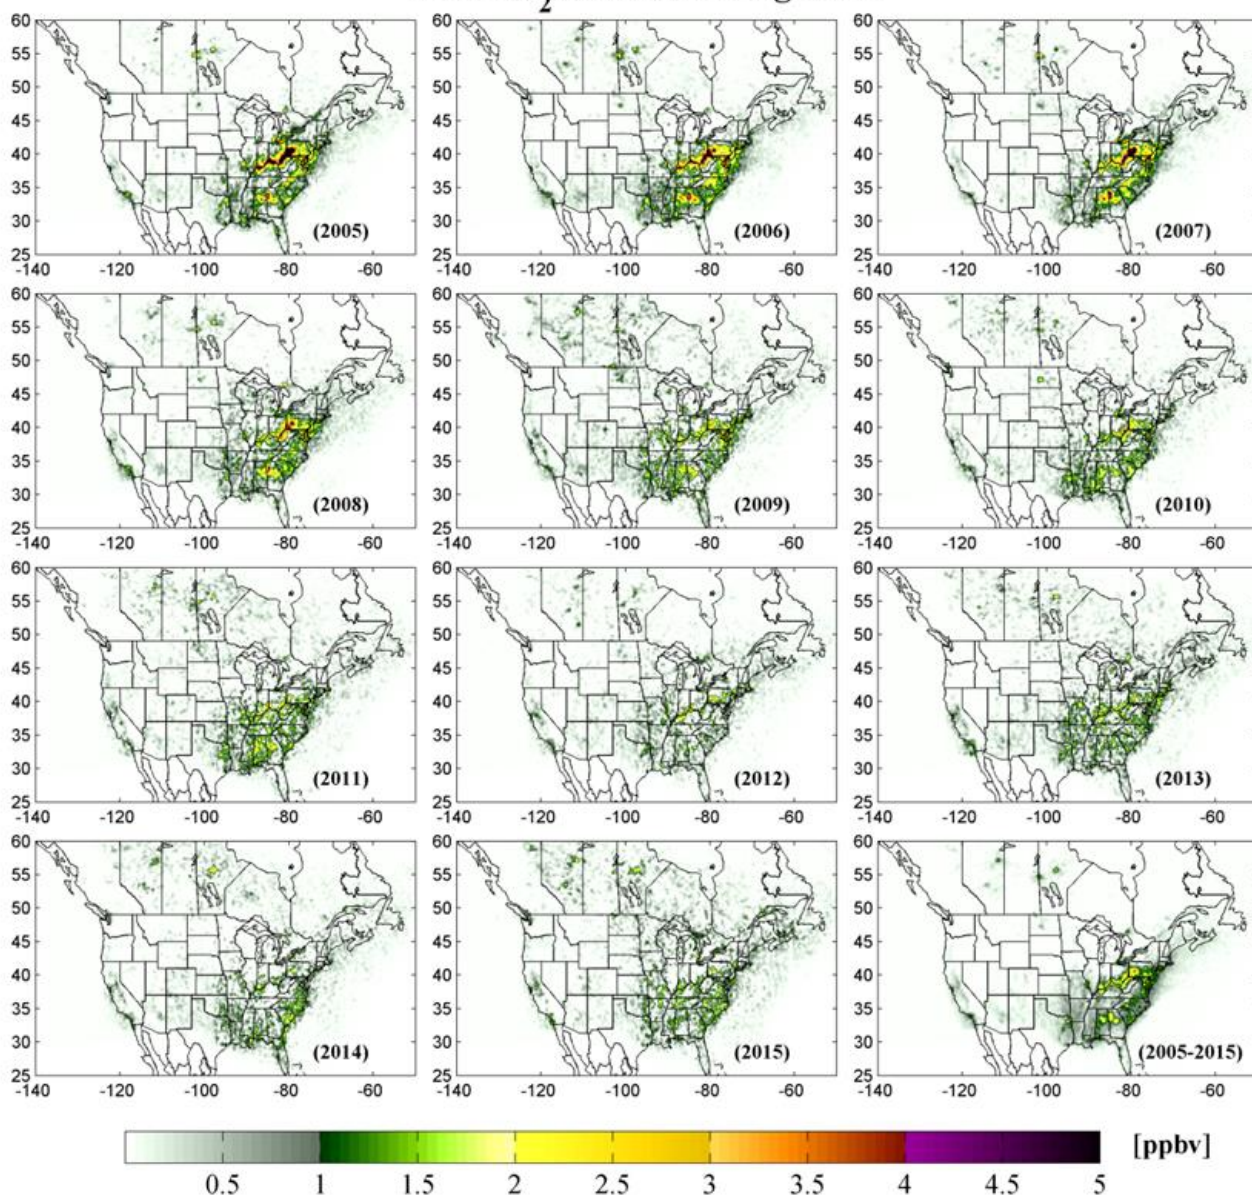

Figure S1: Spatial distribution of annual mean OMI-derived ground-level SO<sub>2</sub> mixing ratio over North America for the period of 2005 to 2015.

5

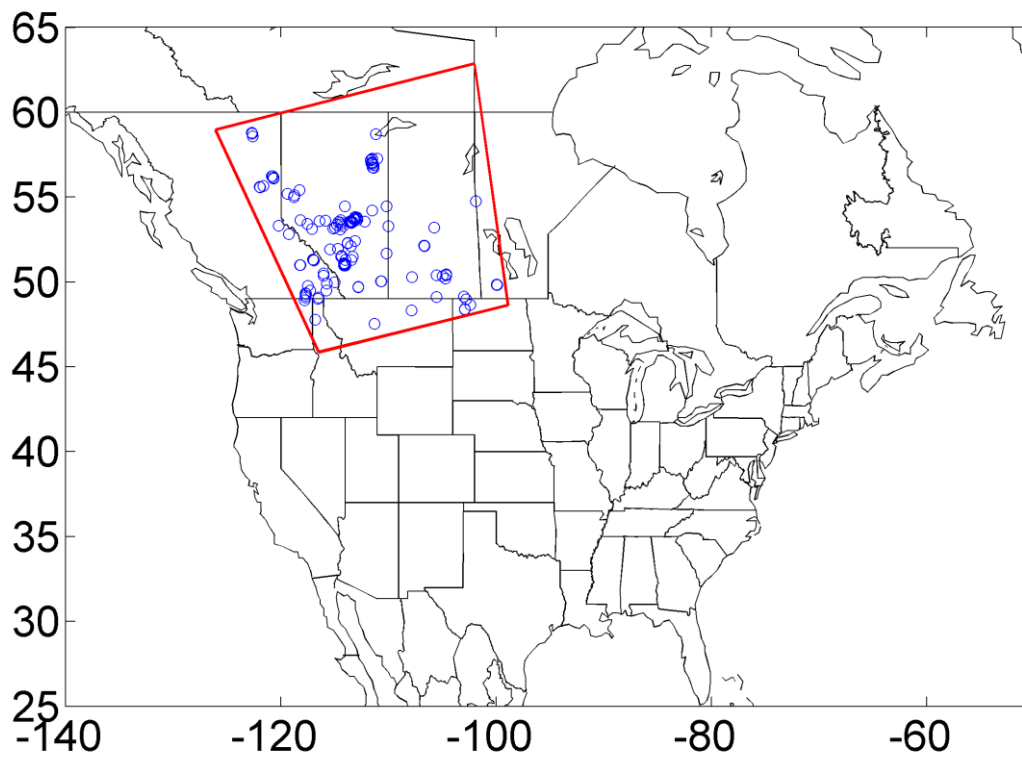

**Figure S2: Geographical location of GEM-MACH model domain is shown with a red polygon. The in-situ monitors locations are shown with blue circles.**

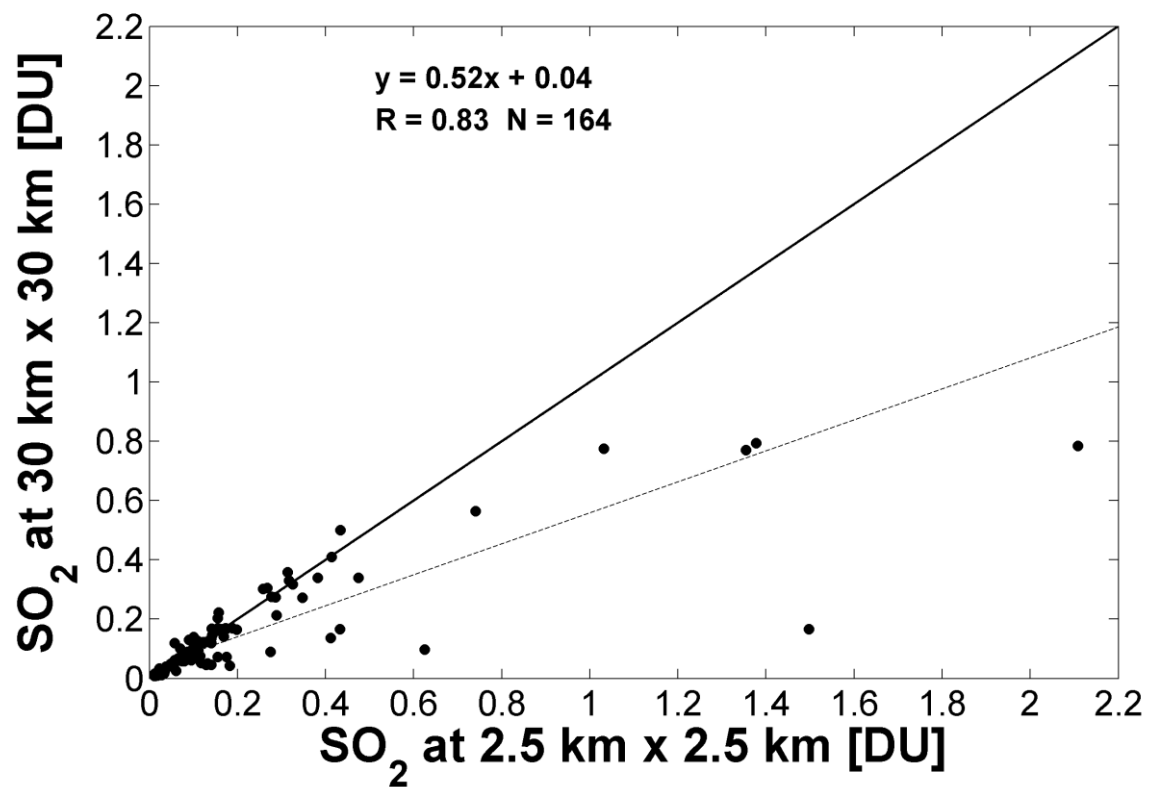

Figure S3: Scatter plot of GEM-MACH SO<sub>2</sub> column.

5

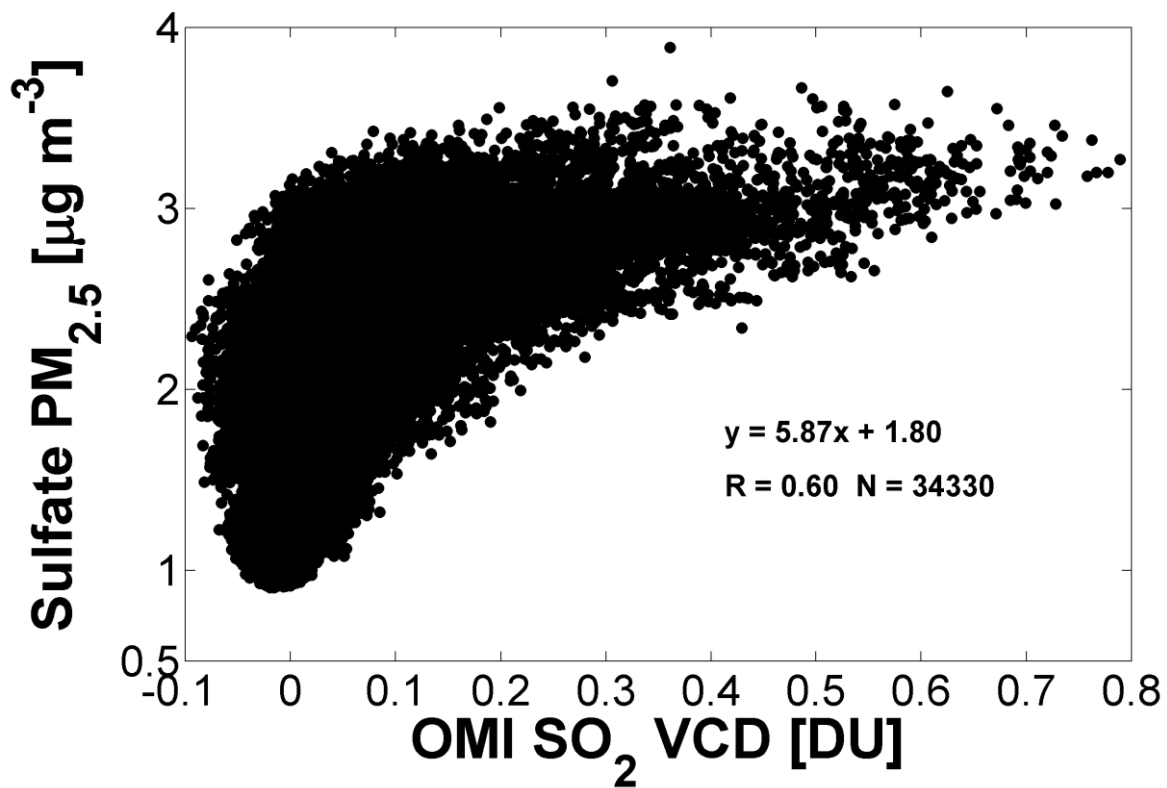

Figure S4: Scatter plot of OMI SO<sub>2</sub> VCD versus sulfate PM<sub>2.5</sub> over eastern North America.
